# Supplementary material for: Phylogenetic Analysis of Pyruvate-Ferredoxin Oxidoreductase, a Redox Enzyme Involved in the Pharmacological Activation of Nitro-Based Prodrugs in Bacteria and Protozoa
Source: MDPI journal article supplement (doi:10.3390/biology13030178), 2024-03-09
Supplement: s1 [file s1]

**Table S1**

**Gene and accession numbers of the redox enzymes and control proteins from the UniProt™ Protein Database**

| Parasite              | Enzyme | Gene number | Accession number | Redox drug    |
|-----------------------|--------|-------------|------------------|---------------|
| <i>G. duodenalis</i>  | PFOR   | Q24982      | AAA74894.1       | Metronidazole |
| <i>E. histolytica</i> | PFOR   | N9TJX2      | ENY63830.1       | Metronidazole |
| <i>C. parvum</i>      | PFOR   | A1DRF1      | ABK91849.1       | Nitazoxanide  |

  

| Parasite              | Control protein1 | Gene/Accession number       | Control protein 2 | Gene/Accession number | Control protein 3 | Gene/Accession number                  |
|-----------------------|------------------|-----------------------------|-------------------|-----------------------|-------------------|----------------------------------------|
| <i>G. duodenalis</i>  | GAPDH            | <b>P53429</b><br>AAB18421.1 | TUB               | A8BPC0<br>EDO78046.1  | <b>RPB1</b>       | <b>Q8MUU2</b><br>AAM77743.1            |
| <i>E. histolytica</i> | GAPDH            | C4LVR9<br>BAN37492.1        | TUB               | P31017<br>AAA57315.1  | <b>RPB1</b>       | Q6IUR3<br>AAT40981.1                   |
| <i>C. parvum</i>      | GAPDH            | Q7YYQ9<br>BAJ77164.1        | TUB               | Q9UAC3<br>AAD20239.1  | <b>RPB1</b>       | <b>A0A7G2HJ78</b><br><b>CAD98371.1</b> |

Table S2

List of protozoa showing how their lifecycle supports the horizontal acquisition of PFOR from bacteria based on the proximity hypothesis.

| Protist                | Life cycle                                                                                | PFOR                                                                                  |
|------------------------|-------------------------------------------------------------------------------------------|---------------------------------------------------------------------------------------|
| <b>Blastocystis</b>    | <b>Gastro-intestinal tract, facultative, strict anaerobe, direct vertebrate parasites</b> |    |
| Phytophthora           | Free living fungal-like protists, plant parasites                                         |                                                                                       |
| Pythium                | Free living fungal-like protists, predominantly plant parasites                           |                                                                                       |
| Achlya                 | Free living fungal-like protists, plant parasites                                         |                                                                                       |
| Thraustotheca          | Free living fungal-like protists, plant parasites                                         |                                                                                       |
| Theileria              | Erythrocytes, insect-borne cattle parasite                                                |                                                                                       |
| Babesia                | Erythrocytes, insect-borne vertebrate parasites                                           |                                                                                       |
| Plasmodium             | Erythrocytes, insect-borne vertebrate parasites                                           |                                                                                       |
| <b>Eimeria</b>         | <b>Gastro-intestinal tract, direct vertebrate parasites</b>                               |    |
| <b>Cryptosporidium</b> | <b>Gastro-intestinal tract, direct vertebrate parasites</b>                               |    |
| Toxoplasma             | Diverse cells, obligate intracellular vertebrate parasites                                |                                                                                       |
| Tetrahymena            | Free living                                                                               |                                                                                       |
| Paramecium             | Free living                                                                               |                                                                                       |
| Plasmodiophora         | Free living                                                                               |                                                                                       |
| Reticulomyxa           | Free living                                                                               |                                                                                       |
| Trypanosoma            | Blood stream, insect-borne vertebrate parasites                                           |                                                                                       |
| Leishmania             | Macrophages, dendritic cells, insect-borne vertebrate parasites                           |                                                                                       |
| Naegleria              | free-living amoeboflagellate, aerobic and anaerobic                                       |                                                                                       |
| <b>Entamoeba</b>       | <b>Gastrointestinal tract, anaerobe, direct vertebrate parasites</b>                      |  |
| Dictyostelium          | Free living                                                                               |                                                                                       |
| <b>Giardia</b>         | <b>Gastrointestinal tract, anaerobe, direct vertebrate parasites</b>                      |  |
| <b>Tritrichomonas</b>  | <b>Genito-urinary tract, anaerobe, direct vertebrate parasites</b>                        |  |
| <b>Trichomonas</b>     | <b>Genito-urinary tract, anaerobe, direct vertebrate parasites</b>                        |  |

↕ Straminopiles

↕ Alveolates

↕ Rhizaria

↕ Excavates

↕ Amoebozoa

↕ Metamonads
